# Supplementary material for: Quantitative Analysis of Abamectin, Albendazole, Levamisole HCl and Closantel in Q-DRENCH Oral Suspension Using a Stability-Indicating HPLC-DAD Method
Source: MDPI journal article supplement (doi:10.3390/molecules27030764), 2022-01-24
Supplement: s1 [file Supplementary Tables 17-1-2022.pdf › Supplementary Tables 17-1-2022.pdf]

**Table S1: G- Ruggedness results:**

**Day to day results**

| Replicate   | Albendazole |         | Levamisole HCl |         | Abamectin |         | Closantel |         | Acceptance criteria |
|-------------|-------------|---------|----------------|---------|-----------|---------|-----------|---------|---------------------|
|             | Day 1       | Day 2   | Day 1          | Day 2   | Day 1     | Day 2   | Day 1     | Day 2   |                     |
| 1           | 2128.02     | 2181.64 | 2430.02        | 2501.82 | 433.787   | 435.245 | 1813.52   | 1908.48 |                     |
| 2           | 2129.07     | 2186.61 | 2435.22        | 2501.21 | 434.770   | 432.830 | 1815.23   | 1862.91 |                     |
| 3           | 2132.25     | 2193.71 | 2435.62        | 2515.18 | 436.405   | 433.937 | 1823.48   | 1864.17 |                     |
| Pooled Mean | 2158.5      |         | 2469.8         |         | 434.5     |         | 1848.0    |         |                     |
| Pooled SD   | 31.8        |         | 40.0           |         | 1.3       |         | 37.4      |         |                     |
| Pooled RSD  | 1.47        |         | 1.62           |         | 0.29      |         | 2.03      |         | ≤ 3%                |

**Comment: Method is rugged as the pooled RSD is not more than 3%.**

**Table S2: Analyst to analyst results**

| Replicate#  | Albendazole |           | Levamisole HCl |           | Abamectin |           | Closantel |           | Acceptance criteria |
|-------------|-------------|-----------|----------------|-----------|-----------|-----------|-----------|-----------|---------------------|
|             | Analyst 1   | Analyst 2 | Analyst 1      | Analyst 2 | Analyst 1 | Analyst 2 | Analyst 1 | Analyst 2 |                     |
| 1           | 2058.7      | 2010.2    | 2352.2         | 2290.7    | 431.082   | 418.296   | 1756.7    | 1706.0    |                     |
| 2           | 2053.5      | 2006.6    | 2352.8         | 2279.6    | 431.751   | 416.683   | 1751.3    | 1703.7    |                     |
| 3           | 2048.1      | 2002.9    | 2342.2         | 2271.7    | 432.738   | 417.007   | 1755.1    | 1703.2    |                     |
| Pooled Mean | 2030.0      |           | 2314.9         |           | 424.6     |           | 1729.3    |           |                     |
| Pooled SD   | 26.0        |           | 38.1           |           | 8.0       |           | 27.5      |           |                     |
| Pooled RSD  | 1.28        |           | 1.65           |           | 1.88      |           | 1.59      |           | ≤ 3%                |

**Comment: Method is rugged as the pooled RSD is not more than 3**

**Table S3: Results of standard addition technique in the Q-DRENCH formulation**

| ALB   |          | LEV   |          | CLO    |          | ABA   |          |
|-------|----------|-------|----------|--------|----------|-------|----------|
| Conc. | recovery | Conc. | recovery | Conc.  | recovery | Conc. | recovery |
| 31.25 | 97.55    | 50    | 98.15    | 46.88  | 97       | 50    | 98.46    |
| 46.88 | 97.08    | 75    | 98.67    | 70.31  | 97.27    | 75    | 97.57    |
| 62.5  | 98.46    | 100   | 99.04    | 93.75  | 98.34    | 100   | 97.39    |
| 78.13 | 97.66    | 125   | 98.92    | 117.19 | 97.16    | 125   | 98.07    |
| 93.75 | 98.09    | 150   | 97.97    | 140.63 | 98.18    | 150   | 97.16    |
