# Supplementary material for: Quantitative Analysis of Abamectin, Albendazole, Levamisole HCl and Closantel in Q-DRENCH Oral Suspension Using a Stability-Indicating HPLC-DAD Method
Source: MDPI journal article supplement (doi:10.3390/molecules27030764), 2022-01-24
Supplement: s1 [file supplymentry figures 17-1-2022.pdf › supplymentry figures 17-1-2022.pdf]

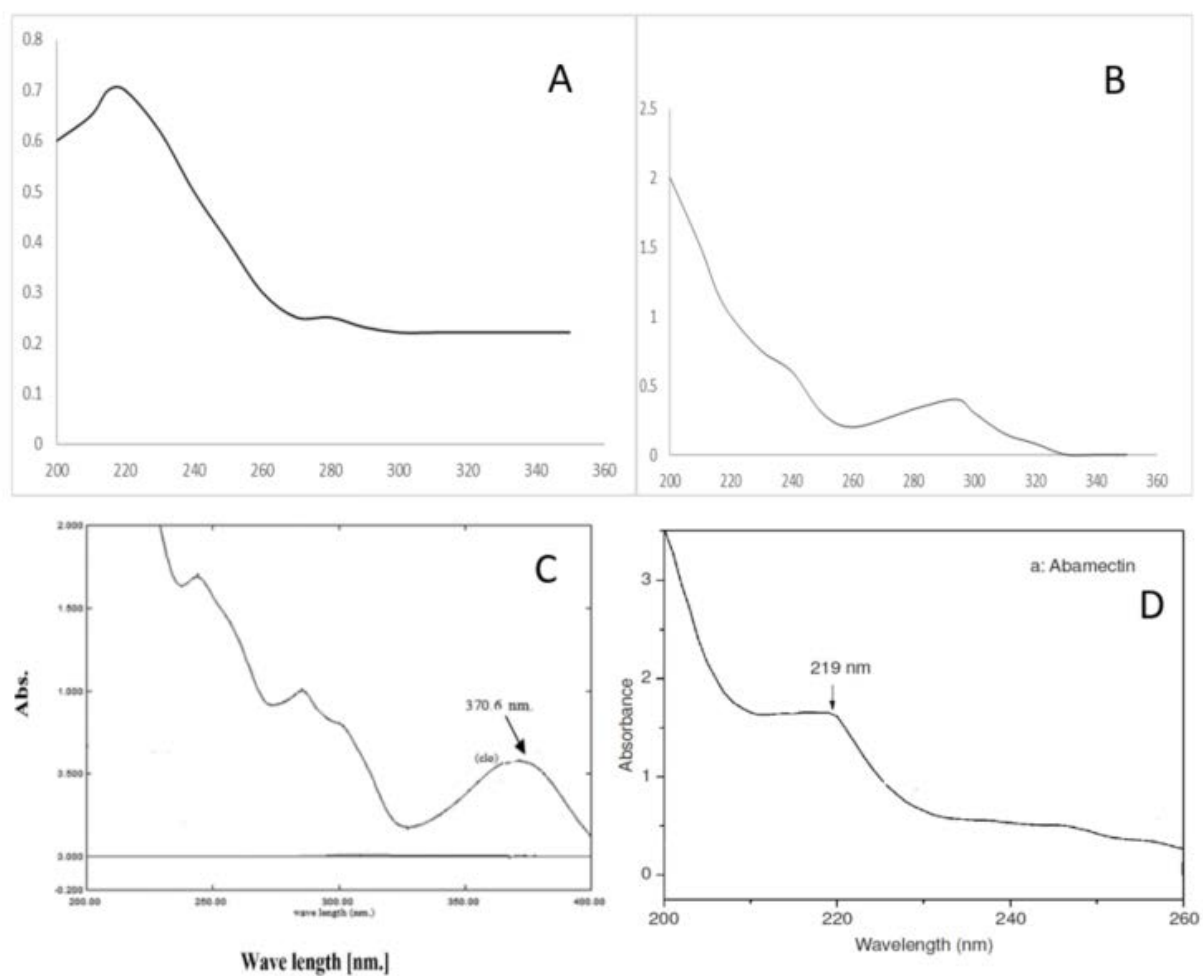

**Figure S1:** UV spectrum of levamisole in water(A); UV spectrum of albendazole in water (B); UV spectrum for Closantel Sodium in 50 % aqueous acetonitrile(C); UV spectrum for Abamectin in water(D).

Albendazole Calibration curve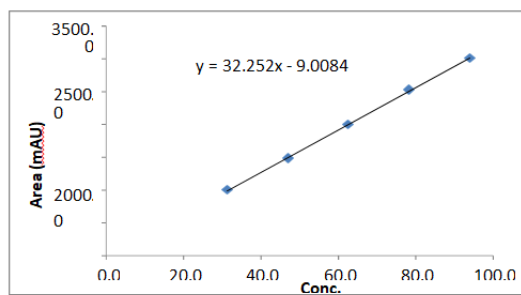Levamisole HCl Calibration curve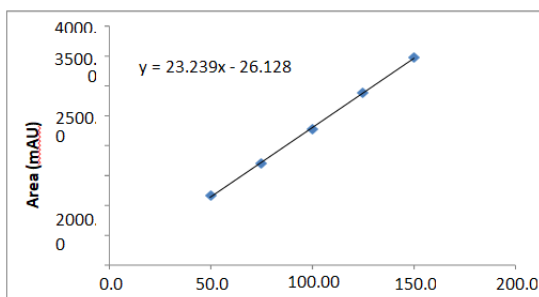Abamectin Calibration curve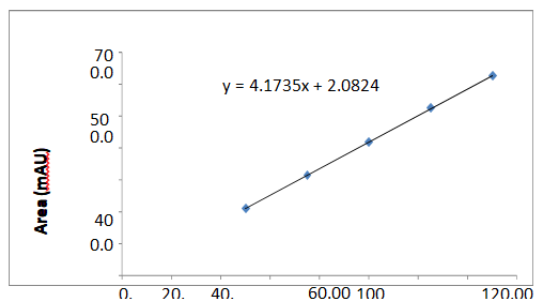Closantel Calibration curve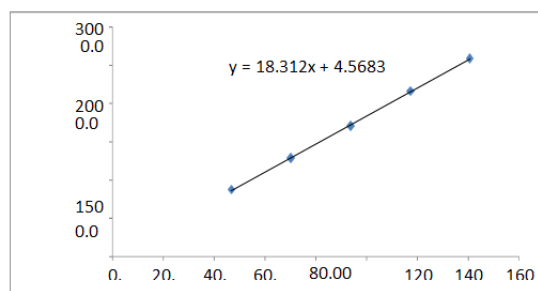**Figure S2:** Calibration curves for the analysis of the four drugs using the new HPLC method

Sample Name: leva\_albenda\_clos pure standards.

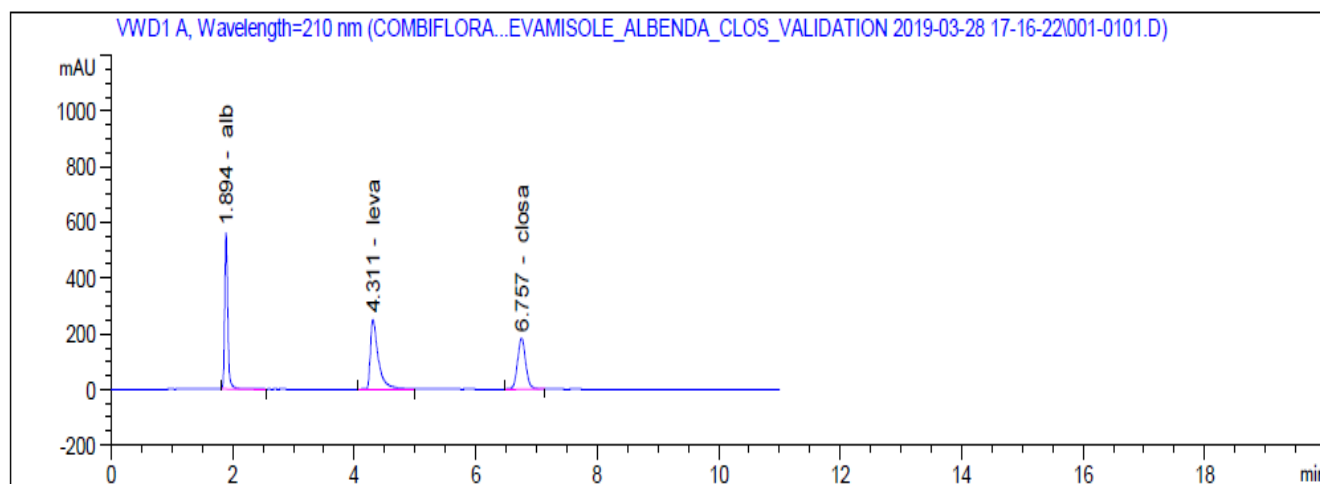

Sample Name: leva\_albenda\_clos dosage form chromatogram

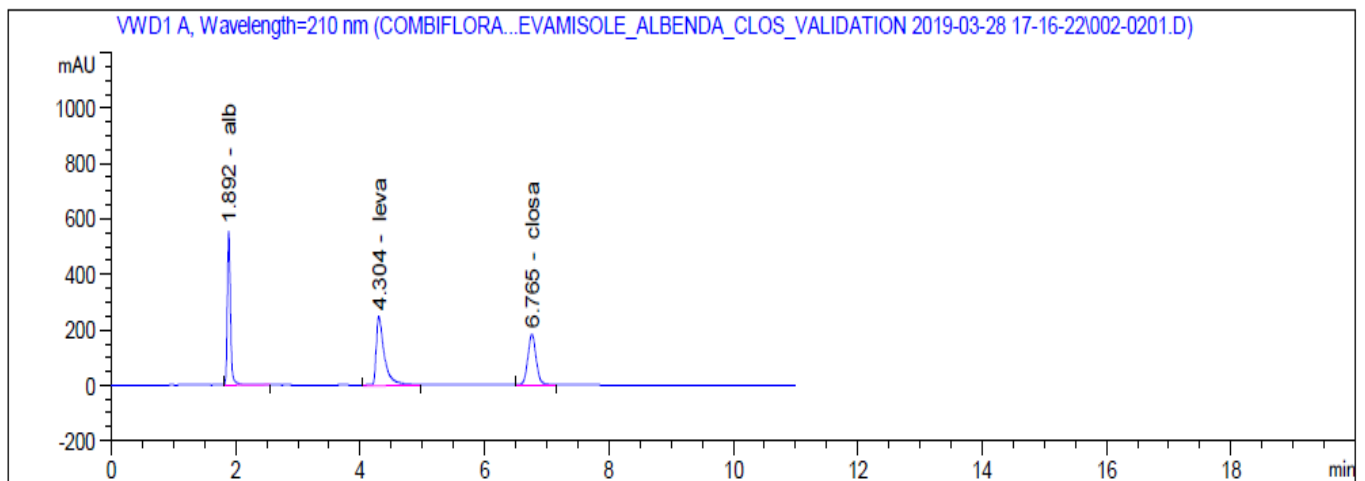

Sample Name: leva\_albenda\_clos Standard placebo

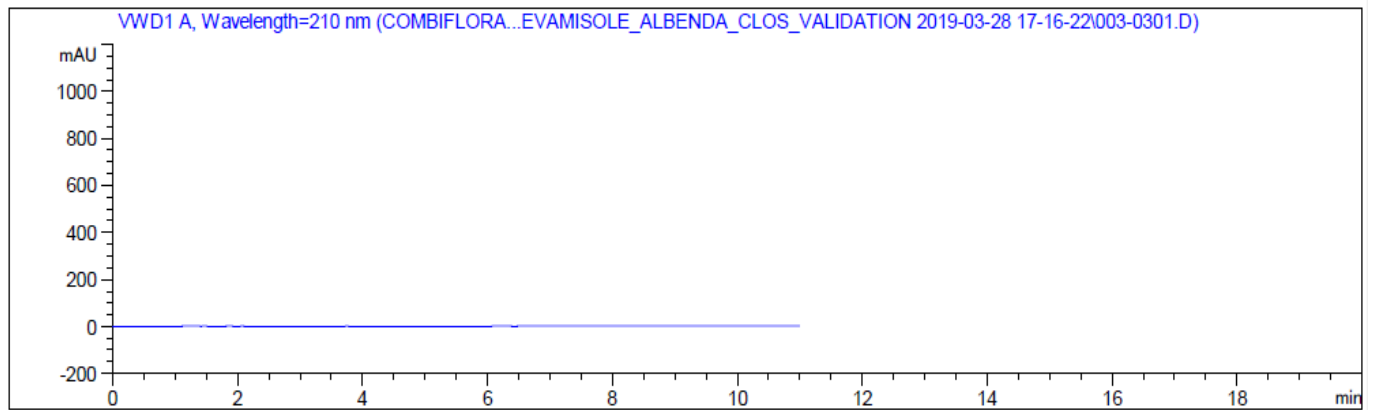

Sample Name: leva\_albenda\_clos standard placebo

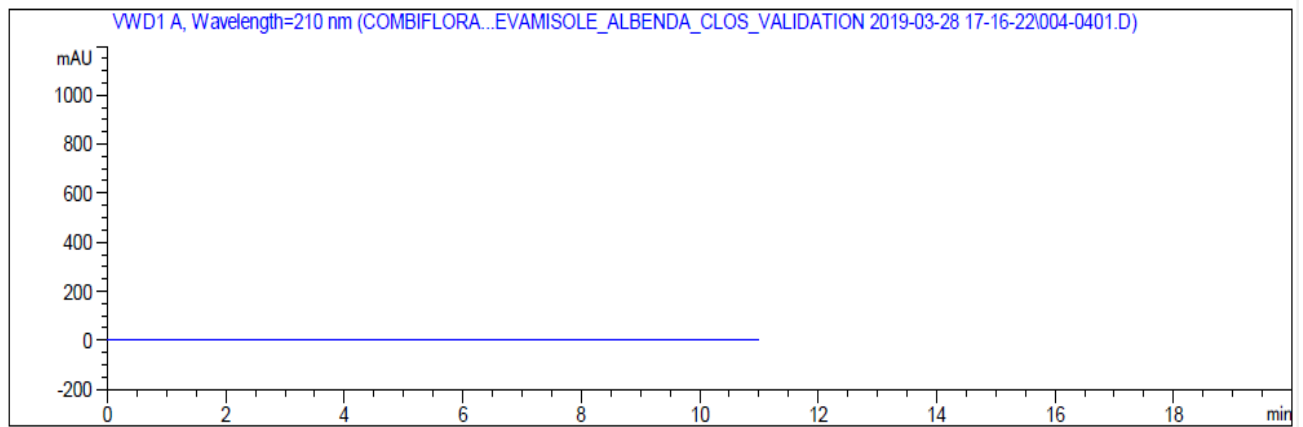

Sample Name: leva\_albenda\_clos photo degradation chromatogram

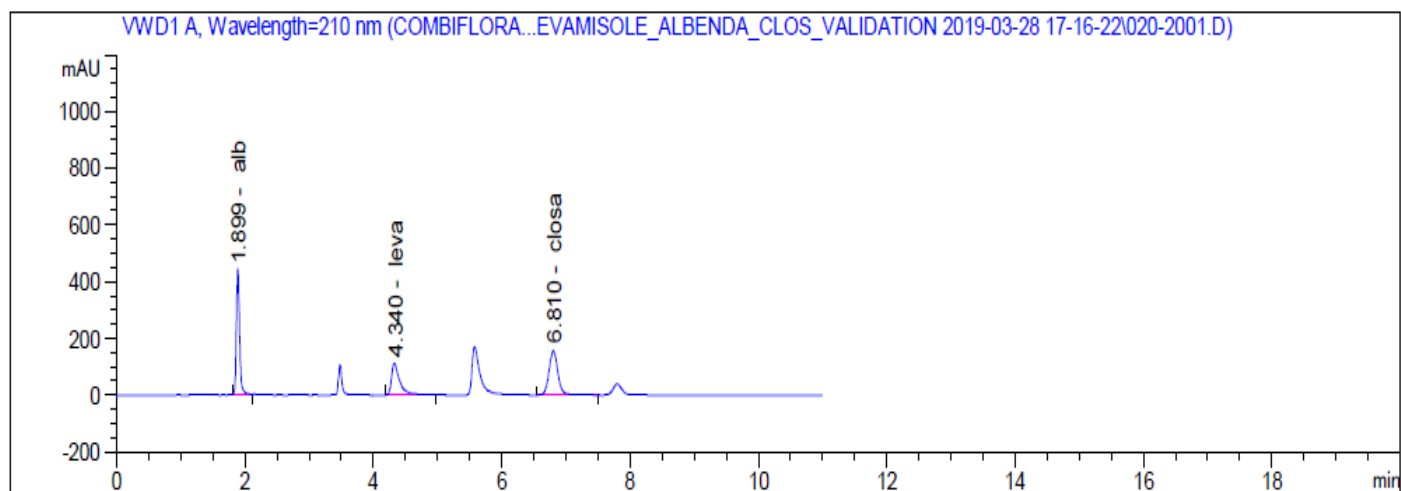

Sample Name: leva\_albenda\_clos heat degradation chromatogram

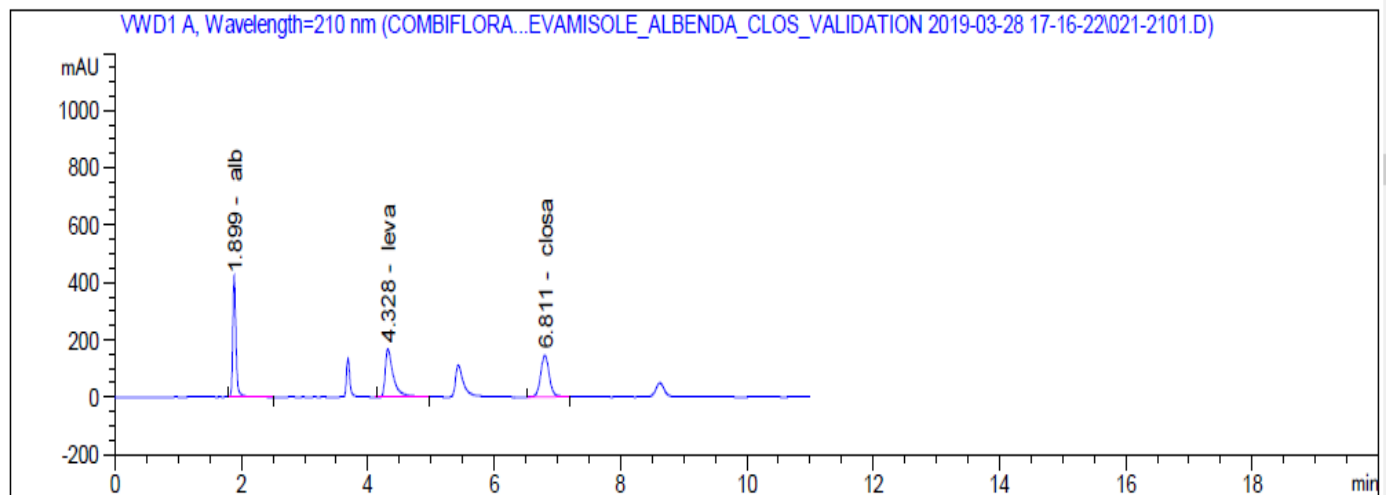

Sample Name: leva\_albenda\_clos acid degradation chromatogram

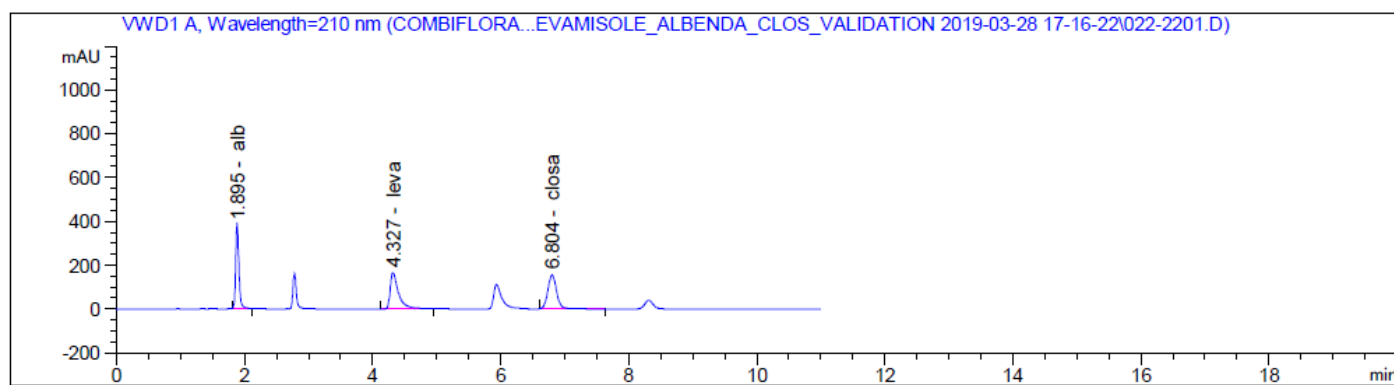

Sample Name: leva\_albenda\_clos base degradation chromatogram

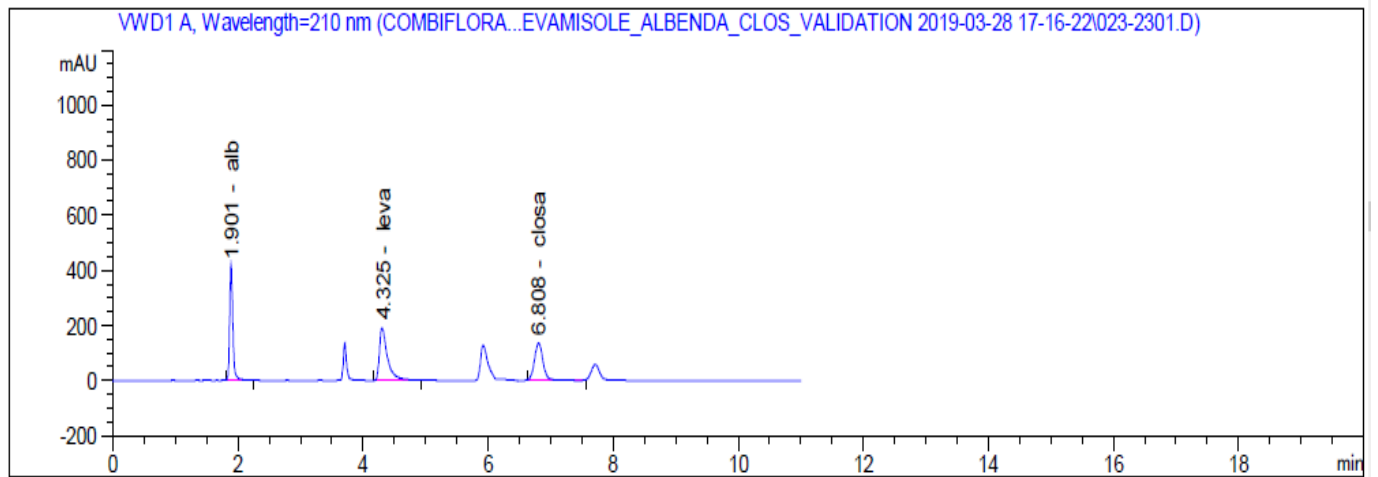

Sample Name: leva\_albenda\_clos oxidative degradation chromatogram

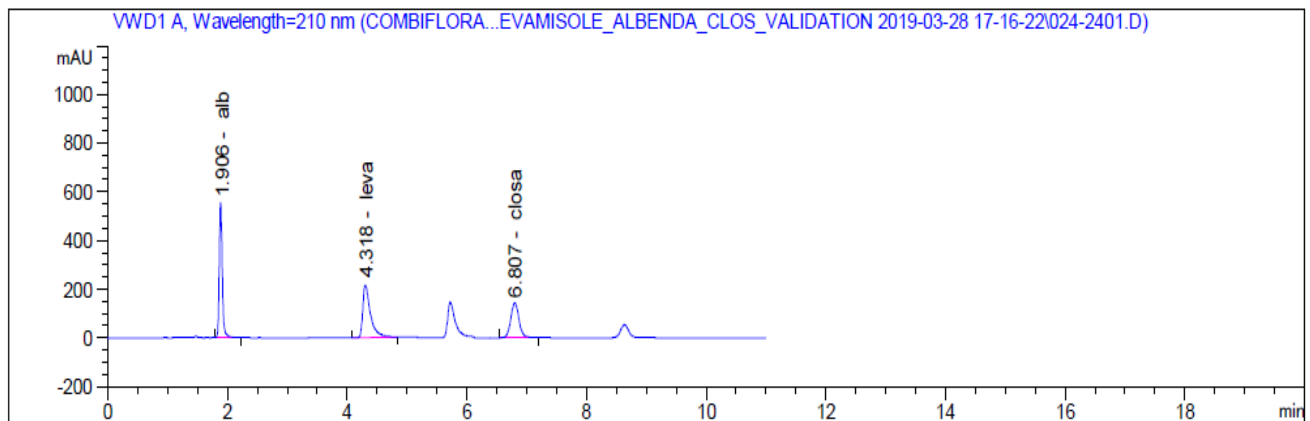

Sample Name: abamectin tested dosage form (placebo)

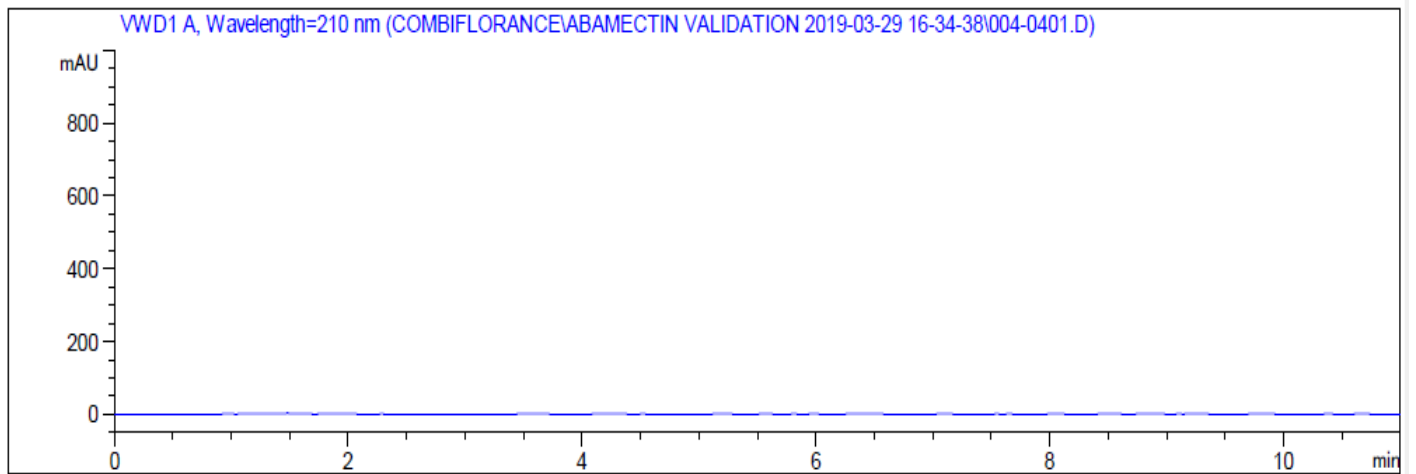

-----

Sample Name: abamectin photo degradation chromatogram

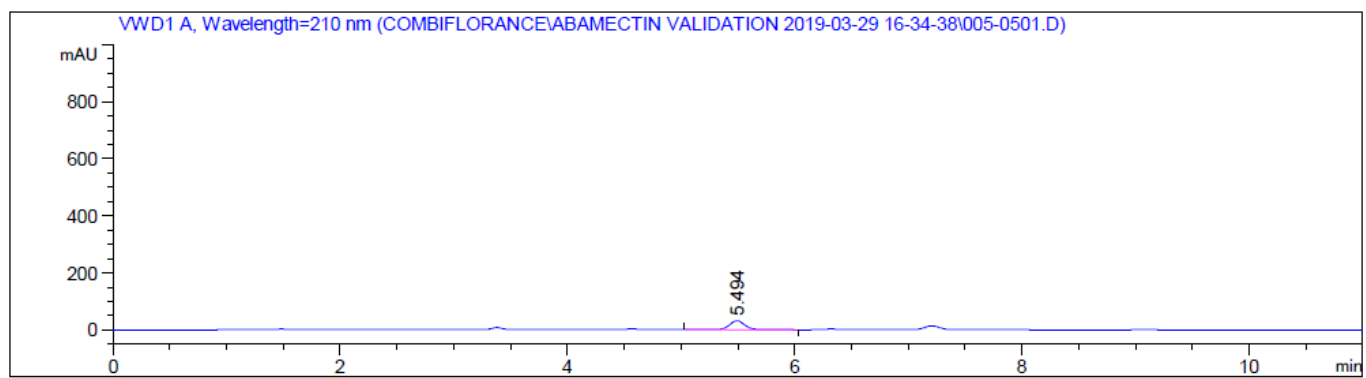

Sample Name: abamectin heat degradation chromatogram

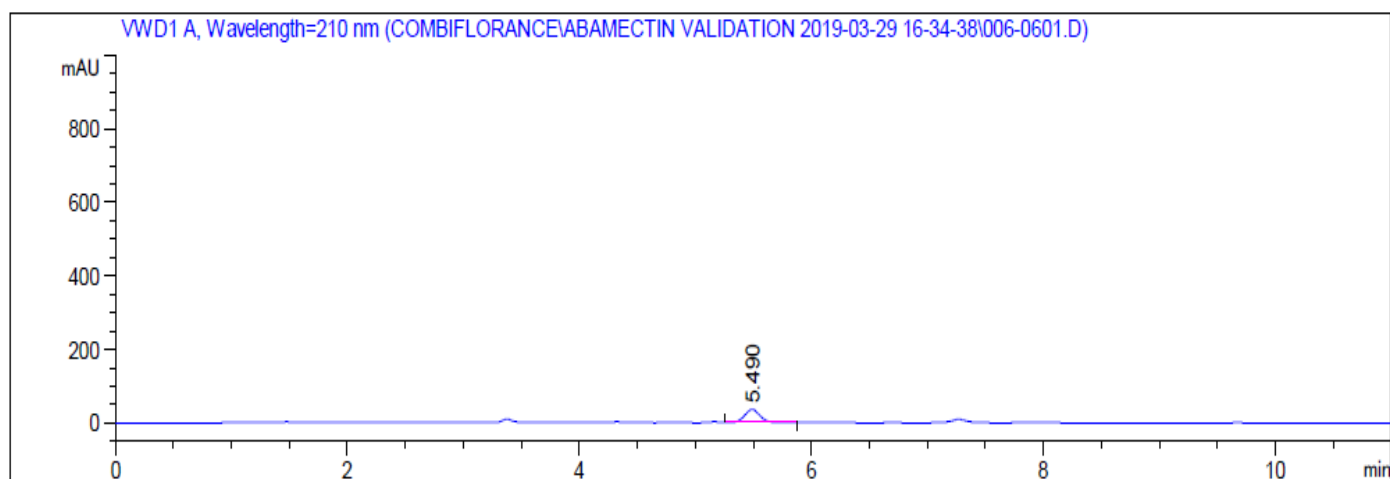

Sample Name: abamectin acid degradation chromatogram

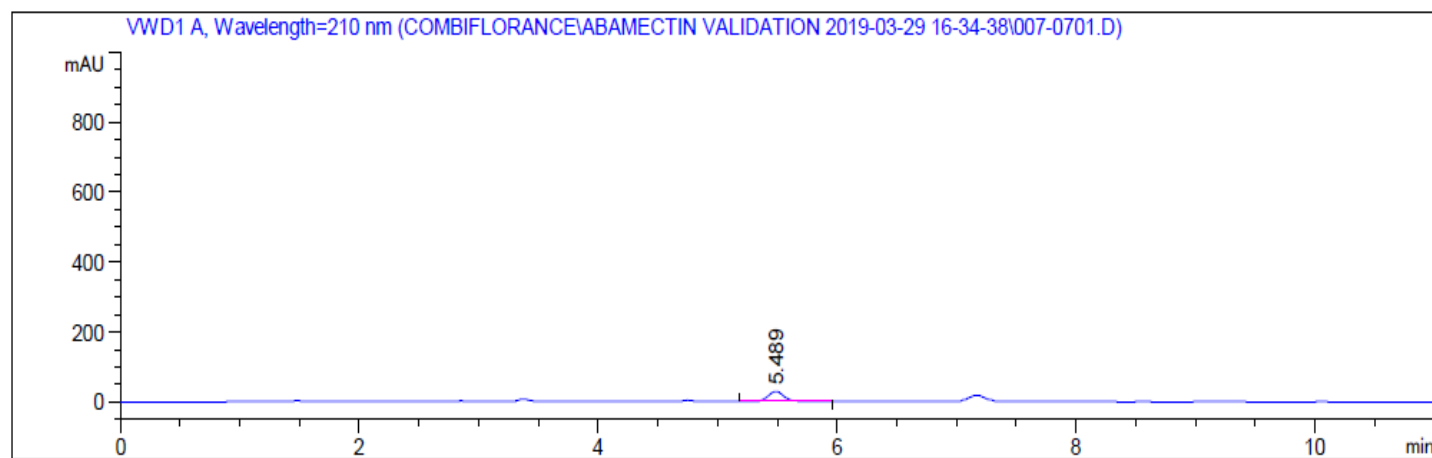

Sample Name: abamectin base degradation chromatogram

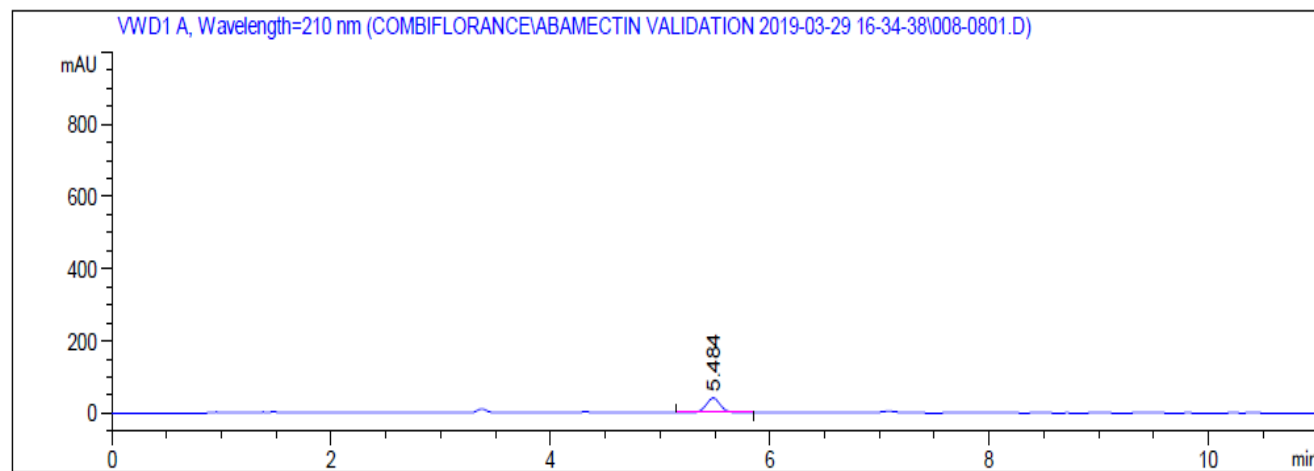

-----

Sample Name: abamectin oxidative degradation chromatogram

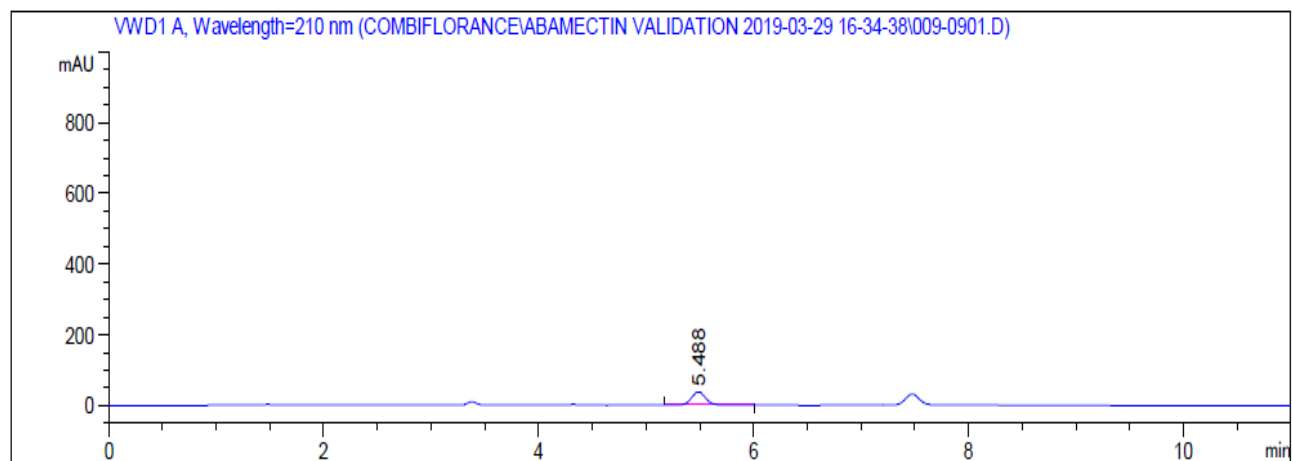

-----
